# TGF- $\beta$ and NF- $\kappa$ B signaling pathway crosstalk potentiates corneal epithelial senescence through an RNA stress response

Zhi-Yuan Li<sup>1</sup>, Zhao-Li Chen<sup>1</sup>, Ting Zhang<sup>1,2</sup>, Chao Wei<sup>1</sup>, Wei-Yun Shi<sup>1</sup>

<sup>1</sup>State Key Laboratory Cultivation Base, Shandong Provincial Key Laboratory of Ophthalmology, Shandong Eye Institute, Shandong Academy of Medical Sciences, Qingdao, China

<sup>2</sup>Qingdao University Medical College, Qingdao, China

**Correspondence to:** Chao Wei; Wei-Yun Shi; **email:** [chaowei\\_82@163.com](mailto:chaowei_82@163.com); [weiyunshi@163.com](mailto:weiyunshi@163.com)

**Keywords:** corneal epithelium, cellular senescence, transforming growth factor- $\beta$ , RNA stress granules, nuclear factor- $\kappa$ B

**Received:** June 6, 2016 **Accepted:** September 20, 2016 **Published:** October 6, 2016

**Correction:** This article has been corrected. Please see Aging 2021: <https://doi.org/10.18632/aging.203516>

## ABSTRACT

The corneal epithelium plays important roles in the maintenance of corneal transparency for good vision, and acts as a protective barrier against foreign insults. Structural and functional changes with aging in the corneal epithelium have been documented. Here we found that transforming growth factor- $\beta$  (TGF- $\beta$ ) is highly expressed in the elderly donor corneal epithelium, as are senescence-associated genes, such as p16 and p21. In human corneal epithelial cell (HCEC) models, TGF- $\beta$  induces cellular senescence, characterized by increased SA- $\beta$ -gal positive cells and elevated expression of p16 and p21. Pharmacological inhibition of TGF- $\beta$  signaling alleviates TGF- $\beta$ -induced cellular senescence. In addition, we determined that senescence-associated inflammation was significantly aggravated in TGF- $\beta$ -induced cellular senescence by detecting the expression of interleukin-6 (IL-6), IL-8, and tumor necrosis factor alpha (TNF $\alpha$ ). Both genetic and pharmacological approaches revealed that blocking nuclear factor- $\kappa$ B (NF- $\kappa$ B) signaling not only inhibited the production of inflammatory factors, but also rescued the senescent phenotype induced by TGF- $\beta$  in HCECs. Mechanistically, TGF- $\beta$  induced an atypical RNA stress responses, leading to accelerated mRNA degradation of I $\kappa$ B $\alpha$ , an inhibitor of NF- $\kappa$ B. Together, our data indicate that TGF- $\beta$ -driven NF- $\kappa$ B activation contributes to corneal epithelial senescence via RNA metabolism and the inflammation blockade can attenuate TGF- $\beta$ -induced senescence.

## INTRODUCTION

The corneal epithelium is the outermost layer of the cornea that is in direct contact with the outside environment, such as UV radiation and opportunistic and pathogenic organisms. It is a stratified structure featuring a 5–7-cell-layer non-keratinized squamous epithelium that is essential for corneal clarity and thus for vision. Functionally, it is an integral component of the ocular defense system, providing a protective barrier for the cornea against pathogen invasion. Likewise, it plays an important regulatory function in the passage of solutes and macromolecules [1]. The homeostasis and self-renewal of the corneal epithelium, like many other epithelial tissues, is tightly controlled. However, ocular diseases that compromise the epithelium, including corneal hypesthesia, diabetic keratopathy, limbal stem cell deficiency, dry eye (DE) disease, exposure

keratopathy, and neurotropic keratopathy, can disrupt homeostatic turnover of the corneal epithelium and ultimately result in devastating consequences to vision and to the cornea's barrier function. Thus, a full understanding of the biological characteristics of the corneal epithelium affords great insight into the health and disease of the ocular surface.

With age, structural and functional changes can be observed in the corneal epithelium. Although central corneal epithelium thickness seems to remain constant, the paracentral corneal epithelium, as well as the nasal and temporal limbal epithelium, becomes thinner over time [2]. The surface of the superficial cells of the corneal epithelium become smoother with advancing age due to the loss of microvilli, microplicae, and glycocalyx [3]. The basal epithelial cell density in the limbus-corneal and limbus-palisade regions also

decreases significantly with age [4]. Besides the structural alterations, functional changes can also be reported. Aging of the ocular surface not only delays corneal wound-healing after laser epithelial keratomileusis (LASEK) [5], but also causes major eye diseases and results in substantial costs in medical and social terms, including DE [6]. Although the age-related senescent phenotype in the normal corneal epithelium has been depicted, the mechanism behind it has not been explicitly illustrated.

Cellular senescence is characterized by irreversible proliferative arrest and a series of morphological and functional alterations, and may further contribute to the decline in organ function and to reduced or lost vitality in organisms [7-9]. Moreover, through the acquisition of a senescence-associated secretory phenotype (SASP), senescent cells can reinforce senescence and activate immune surveillance, and paradoxically have pro-tumorigenic properties [10-12]. Cellular senescence can be induced by various stimuli and stress, including oxidative stress, DNA damage, metabolic insults, oncogene activation, and epigenetic changes [13-17]. Cumulative findings suggest that transforming growth factor- $\beta$  (TGF- $\beta$ ) is also capable of inducing cellular senescence [17-21]. For instance, TGF- $\beta$  has been shown to induce both replicative and premature senescence in epithelial cells and to suppress hTERT expression via a Smad3-mediated signaling pathway [22]. Increased levels of TGF- $\beta$  have been reported in several ocular surface diseases, and have been implicated in their pathogenesis, including pterygium, vernal keratoconjunctivitis (VKC), atopic keratoconjunctivitis (AKC), graft-versus-host disease, and in the DE conjunctiva [23]. However, whether increased levels of TGF- $\beta$  occur in the corneal epithelium during aging, and involve epithelial senescence, is still unknown.

In the present study, we investigated the role of TGF- $\beta$  in the aging corneal epithelium. We found increased expression of TGF- $\beta$  and cellular senescence in the corneal epithelium with age. We demonstrated for the first time that TGF- $\beta$  could induce human corneal epithelial cell (HCEC) senescence and senescence-associated inflammation through RNA stress responses. Inhibition of TGF- $\beta$  signaling or NF- $\kappa$ B signaling rescued TGF- $\beta$ -induced senescence and blocked senescence-related inflammation. Our findings provide insights into the possible contribution of TGF- $\beta$  to age-related ocular epithelial cellular senescence and senescence-related inflammation and, in turn, to age-related ocular diseases, as well as potential therapeutic targets to alleviate age-related ocular diseases.

## RESULTS

### Increased cellular senescence in the corneal epithelium with age

Although age-related structural and functional changes in the corneal epithelium have been documented, the mechanisms underlying them are still unknown. We inferred that corneal epithelial senescence may be a substantial part of the changes. Therefore, we tested cellular senescence in the corneal epithelium. We found that the levels of senescence-related genes in the elderly corneal epithelium, such as *p16* and *p21*, were much higher than in the young corneal epithelium (Fig. 1A). Similarly, the protein levels of them in the elderly corneal epithelium were also elevated, as presented by western blot (Fig. 1B, C). Interestingly, we further found that p16 and p21 protein expressions increased in an age-dependent manner ( $r^2=0.4035$  and  $0.5227$ , respectively), while elevated expressions of p16 and p21 were seen in elderly corneal epithelium (Fig. 1D, E). Our results suggest that increased cellular senescence occurs in the corneal epithelium with age.

### Elevated TGF- $\beta$ in the corneal epithelium with age

Based on the above findings in the corneal epithelium, we questioned what triggered the senescence. A large body of evidence indicates that TGF- $\beta$  signaling is involved in age-related ocular disease and in cellular senescence. Therefore, we analyzed the expression of TGF- $\beta$  in the corneal epithelium. We found that the transcriptional level of *TGF- $\beta$ 1* quantified by real-time PCR was significantly increased in the elderly compared to younger corneal epithelium (Fig. 2A), as well as shown in protein levels using western blot (Fig. 2B). The TGF- $\beta$  protein level detected with immunohistochemistry was also increased in an age-dependent manner ( $r^2=0.7105$ ), with strong staining in older corneal epithelium, but weak staining in younger ones (Fig. 2C, D). Together with the literature, these results suggest that the increased TGF- $\beta$  found in the corneal epithelium with aging may correlate to the increased senescence.

### TGF- $\beta$ induces cellular senescence in HCECs with increased production of inflammatory mediators

To assess the effect of TGF- $\beta$ 1 on corneal epithelial senescence, we used HCECs as models. Cellular senescence is defined as an irreversible arrest of mitotic cells at the G1 phase, but some cancer cells enter senescence at the G2 or S phase [24]. Cell cycle analysis by flow cytometer showed that the HCECs accumulated at G1 phase (from 60.76% to 72.83%) with

a concomitant depletion of S phase cells (from 16.87% to 9.70%) after TGF- $\beta$ 1 exposure (Fig. 3A, B), suggesting that cell cycle arrest during HCECs senescence induced by TGF- $\beta$ 1 occurred at G1 phase, while H<sub>2</sub>O<sub>2</sub> induced an obvious G2/M phase arrest. In association with the G1 arrest, we also found TGF- $\beta$ 1 increased the percentage of SA- $\beta$ -gal-staining cells (Fig. 3C, D) and concomitantly increased the expression of p16 and p21, as analyzed by real-time PCR or western blot (Fig. 3E, F). In order to further confirm the effect of TGF- $\beta$  on cellular senescence, we interrupted

the TGF- $\beta$  signaling pathway using a specific inhibitor, LY364947. When treated with LY364947, the percentage of SA- $\beta$ -gal-staining cells was significantly decreased (Fig. 3C, D), and the levels of p21 and p16 were also downregulated (Fig. 3E, F). Taken together, these findings suggested that TGF- $\beta$ 1 was able to induce senescence in HCECs.

It is well-known that aged and senescent cells develop a complex SASP [25]. Further evidence demonstrates that increased production of inflammatory mediators, such

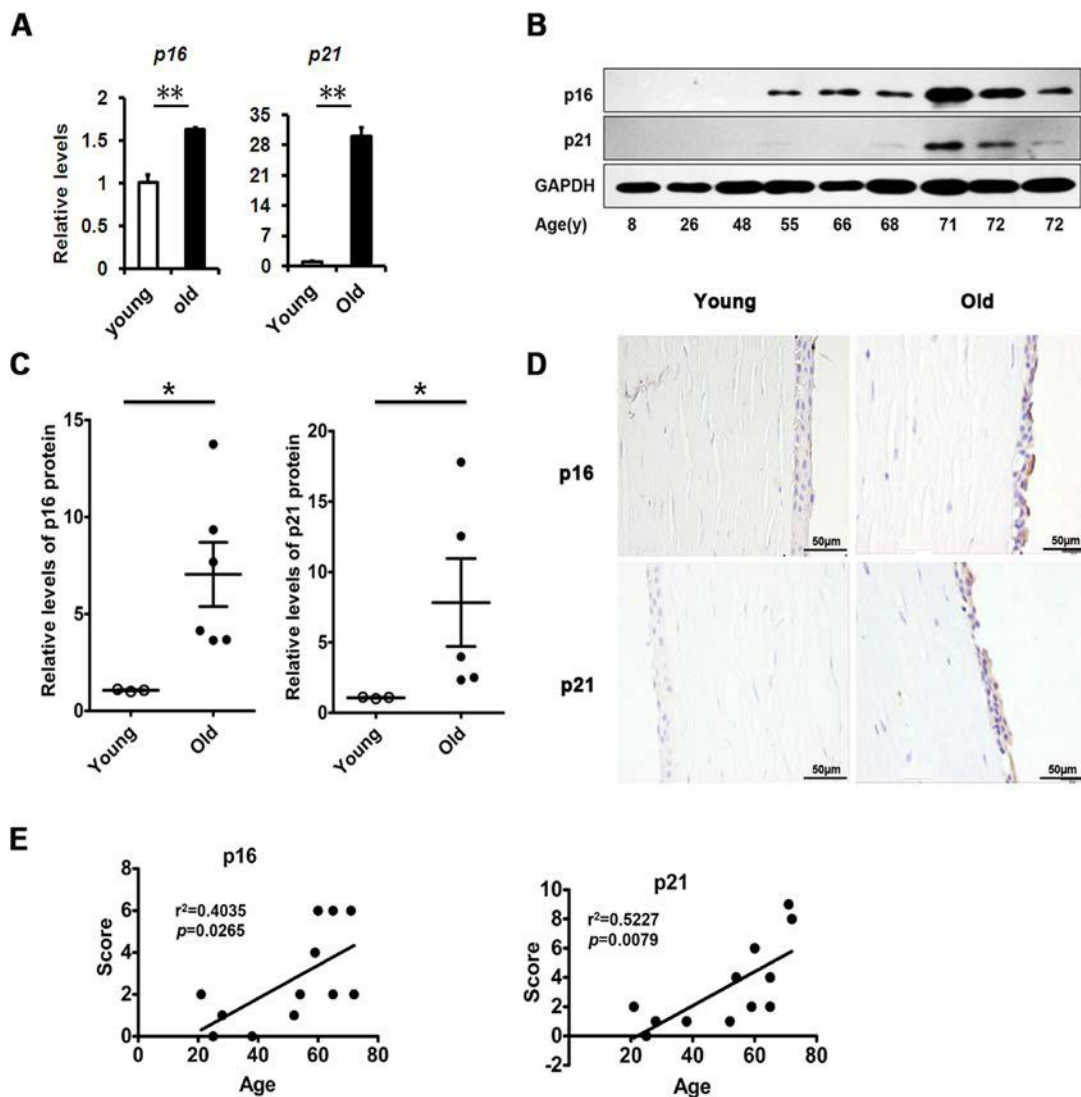

**Figure 1. Senescence-associated markers rise with age in human corneal epithelium.** (A) The mRNA expression of p16 and p21 in young donors ( $\leq 30$  years of age) and old donors ( $\geq 50$  years of age) corneal epithelium (\*\* $P \leq 0.01$ ,  $n=3$ ). (B) Immunoblot analysis of p16 and p21 in the corneal epithelium during aging. (C) Quantification of western blots processed with Image J. (D-E) Representative photographs (D) and histopathology scores (E) for the IHC staining of p16 and p21 in corneal epithelium from donors of different ages. There were statistically significant differences in p16 and p21 expression between the donors of younger than 30 years and older than 50 years of age ( $P \leq 0.05$ ). The figure depicts a Pearson correlation of p16 and p21 protein expression with age (E).

as interleukin (IL)-6 and -8, during aging play a substantial role in the establishment and maintenance of the senescent phenotype [12, 26]. To test whether senescence-associated inflammation happens during TGF- $\beta$ 1-induced cellular senescence in HCECs, we measured the expression levels of the key inflammatory mediators during cellular senescence. In TGF- $\beta$ 1-induced senescent cells, elevated IL-6 and IL-8 gene expression (Fig. 4A) and secretion (Fig. 4B) was induced, as well as tumor necrosis factor alpha (TNF $\alpha$ ) (Fig. 4A). More importantly, LY-364947 treatment not only rescued cells from TGF- $\beta$ 1-induced cellular senescence, but also inhibited the expression of IL-6 and IL-8, indicating diminished senescence-associated inflammation (Fig. 4A, B). Numerous studies show that the expression of inflammatory factors, such as IL-6, IL-8 and TNF $\alpha$ , mainly relies on NF- $\kappa$ B signaling pathway. We found that NF- $\kappa$ B signaling was significantly activated in TGF- $\beta$ 1-induced senescent HCECs, as evaluated by nuclear translocation of p65 using immunofluorescence and western blot (Fig. 4C, D). These results demonstrated that TGF- $\beta$  signaling controls the expression of inflammatory mediators through NF- $\kappa$ B signaling during cellular senescence.

## NF- $\kappa$ B activation by TGF- $\beta$ contributes to senescence-associated inflammation

It has been widely accepted that TGF- $\beta$  has an anti-inflammatory role in immune responses, but in certain pathological conditions, TGF- $\beta$  can also be pro-inflammatory [27]. However, its pro-inflammatory roles are still unclear. Because NF- $\kappa$ B has been shown to mediate inflammation in aging [28], we analyzed whether NF- $\kappa$ B signaling components were differentially expressed in senescent HCECs induced by TGF- $\beta$ 1 versus that of pre-senescent cells. Compared with pre-senescent cells, TGF- $\beta$ 1 treatment led to significant reduction in I $\kappa$ B $\alpha$  protein levels (Fig. 4E, F). I $\kappa$ B $\alpha$  is a canonical and specific inhibitor of NF- $\kappa$ B, and its reduction suggested elevated NF- $\kappa$ B activity in TGF- $\beta$ 1-induced senescent cells; our subsequent results confirmed this. I $\kappa$ B $\alpha$  loss is the key step that immediately releases cytoplasmic NF- $\kappa$ B for nuclear translocation and the subsequent phosphorylation of p65, a subunit of NF- $\kappa$ B. Therefore, we measured the phosphorylation of p65 in HCECs treated with or without TGF- $\beta$ . Much more phosphorylation of p65 was found in TGF- $\beta$ -treated HCECs than in untreated cells

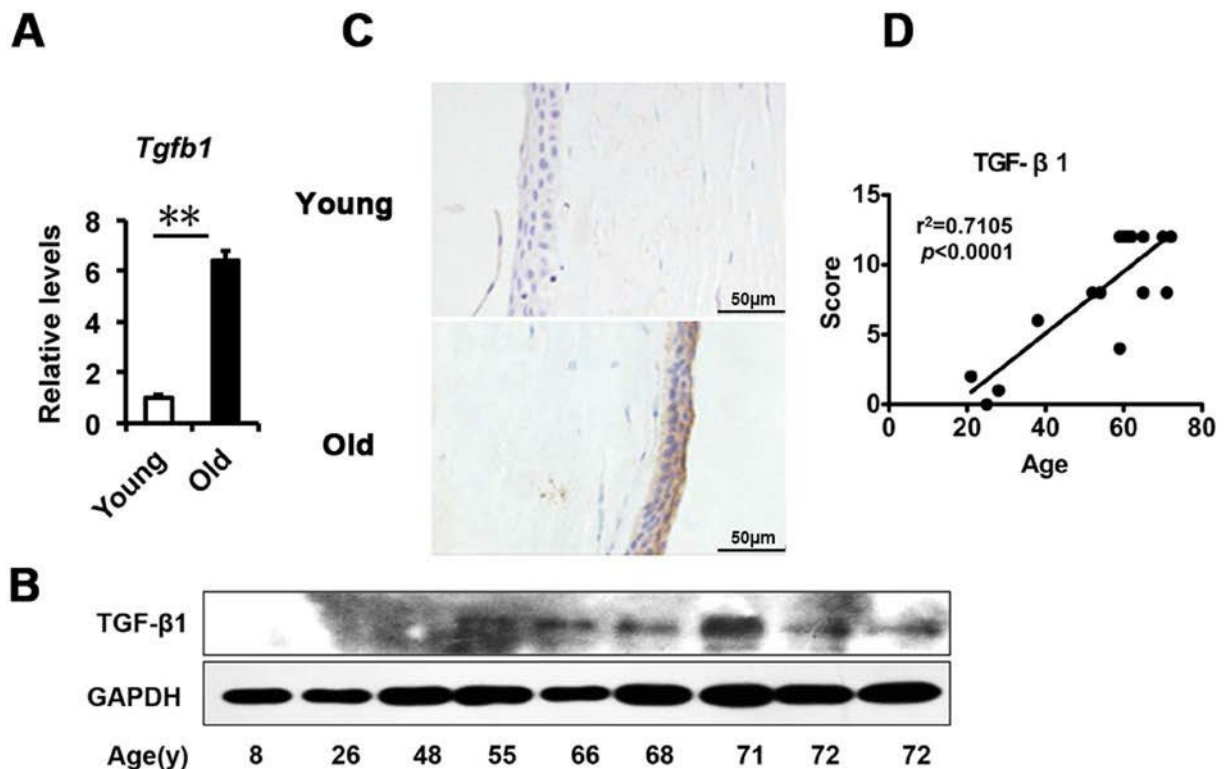

**Figure 2. TGF- $\beta$ 1 excess in old donor corneal epithelium.** (A) The mRNA expression of *Tgfb1* in young donors and old donors corneal epithelium (\*\* $P \leq 0.01$ ,  $n=3$ ). (B) Immunoblot analysis of TGF- $\beta$ 1 in the corneal epithelium during aging. (C-D) Representative photographs (C) and histopathology scores (D) for the IHC staining of TGF- $\beta$ 1 in corneal epithelium from donors of different ages. There was a statistically significant difference in TGF- $\beta$ 1 expression between the donors of younger than 30 years and older than 50 years of age ( $P \leq 0.01$ ). The figure depicts a Pearson correlation of TGF- $\beta$ 1 expression with age (D).



(Fig. 4E, F). The results indicated that the TGF- $\beta$  signaling pathway increased the NF- $\kappa$ B activity.

Phosphorylation of I $\kappa$ B $\alpha$  induced by kinase is a crucial reaction for I $\kappa$ B $\alpha$  degradation and NF- $\kappa$ B activation in classic inflammation. However, we noted that the phosphorylated levels of I $\kappa$ B $\alpha$  did not change when normalized by I $\kappa$ B $\alpha$  protein levels (Fig. 4F). We also found that the TGF- $\beta$  treatment did not change the phosphorylation of TGF- $\beta$ -activated kinase-1 (TAK-1), which can mediate TGF- $\beta$ -induced NF- $\kappa$ B activation (Fig. 4E). Altogether, the results suggest that TGF- $\beta$  probably uses a mechanism through directly targeting I $\kappa$ B $\alpha$ , rather than upstream kinase signaling, to activate NF- $\kappa$ B in HCECs.

### RNA stress response activates NF- $\kappa$ B

In order to explore how TGF- $\beta$  could activate NF- $\kappa$ B in a kinase-independent manner, attention was paid to the regulation of mRNA levels. In coping with inflammatory stress, eukaryotic cells can develop a process known as an RNA stress response, characterized by RNA stress granules (SGs) and processing bodies (PBs), to control the degradation of mRNA [29, 30]. In this regard, we speculated that RNA stress induced by TGF- $\beta$  could be implicated in the degradation of I $\kappa$ B $\alpha$  mRNA. Therefore, we tested whether TGF- $\beta$ -induced NF- $\kappa$ B activation in HCECs relies on this mechanism. First, we analyzed the expression of these RNA SG and PB genes in our

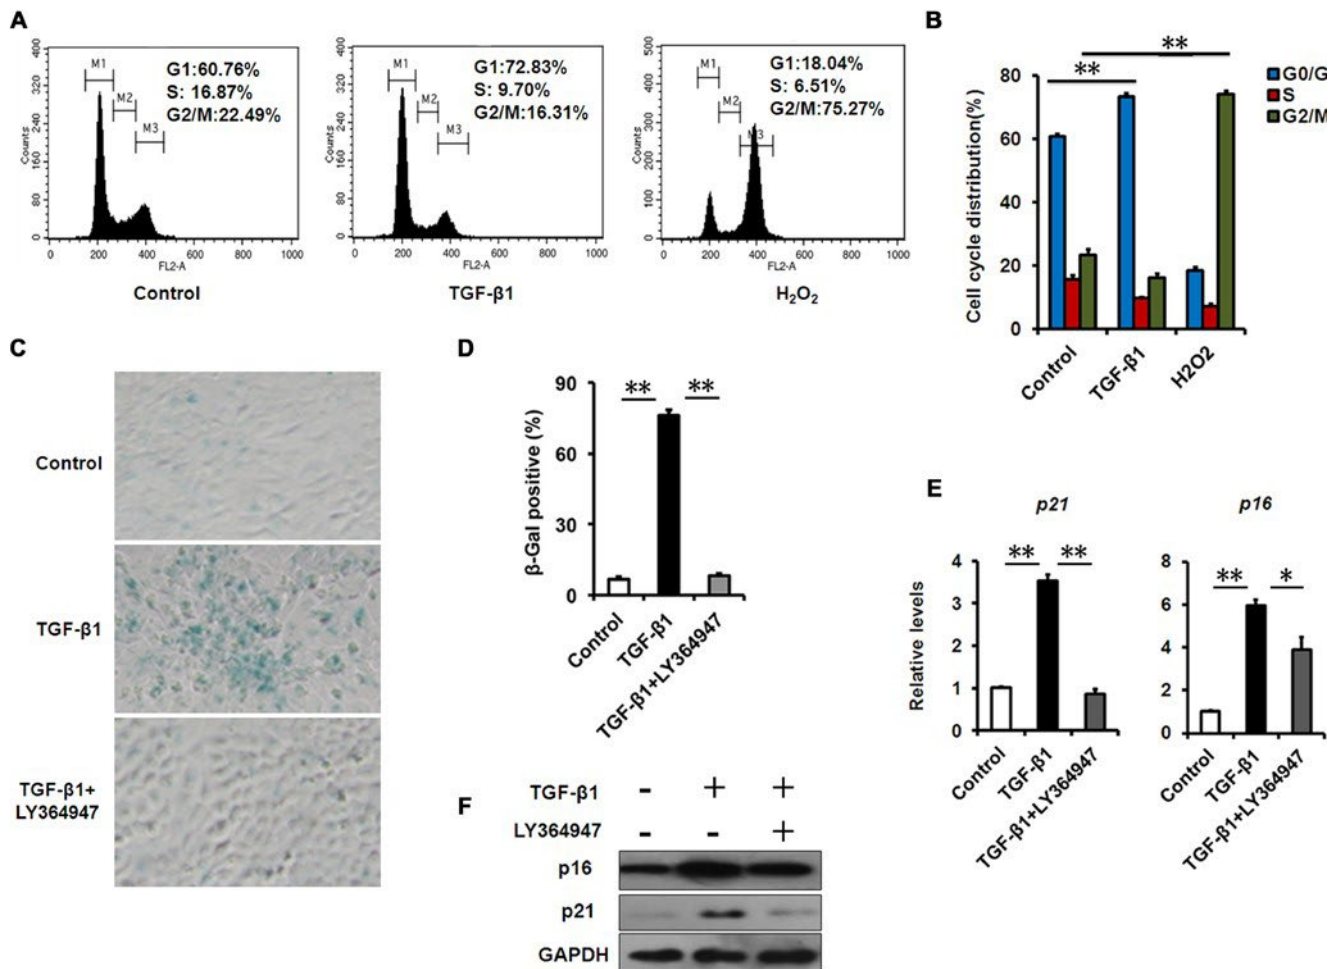

**Figure 3. TGF- $\beta$ 1 induces cellular senescence in HCECs.** (A-B) The G1 phase arrest was induced by TGF- $\beta$ 1 treatment. Control and TGF- $\beta$ 1-treated HCECs were subjected to cell cycle analysis after 48h of culture. HCECs treated with H<sub>2</sub>O<sub>2</sub> (200 $\mu$ M) were taken as positive control. A representative flow cytometric analysis of the DNA content was shown in (A) and the values are mean $\pm$ SD (B). (C) HCECs were treated with TGF- $\beta$ 1 (10 ng/ml) alone, or in combination with LY364947 (2 $\mu$ M) for 3days, and tested for SA- $\beta$ -Gal activity. (D) The percentage of SA- $\beta$ -gal -positive cells in HCECs. (E-F) The mRNA (E) and protein (F) expression of p16 and p21 in HCECs induced by TGF- $\beta$ 1. Bar graphs represent mean $\pm$ SD. \*\*P $\leq$ 0.01, \*P  $\leq$ 0.05 vs. control. Data are representative of three independent experiments.

HCEC models, and found that many of them were increased in TGF- $\beta$ -treated HCECs (Fig. 5A). Consistent with this observation, we examined whether the morphology of RNA SGs could be detected in TGF- $\beta$ -treated HCECs. We stained HuR, a molecular component of RNA SGs, and found that HuR-positive aggregates presented in TGF- $\beta$ -treated HCECs but barely presented in untreated cells (Fig. 5B). The phosphorylation of the alpha subunit of eukaryotic

translation initiation factor (eIF2 $\alpha$ ) is essential for SGs assembly [31]. We further measured the phosphorylation levels of eIF2 $\alpha$  in HCECs treated with TGF- $\beta$ , and found that it was much higher after TGF- $\beta$  exposure (Fig. 5C, D). These data suggest that an RNA stress response could be substantial part of the TGF- $\beta$ -induced inflammation in HCECs.

RNA SGs and PBs can mediate the degradation of

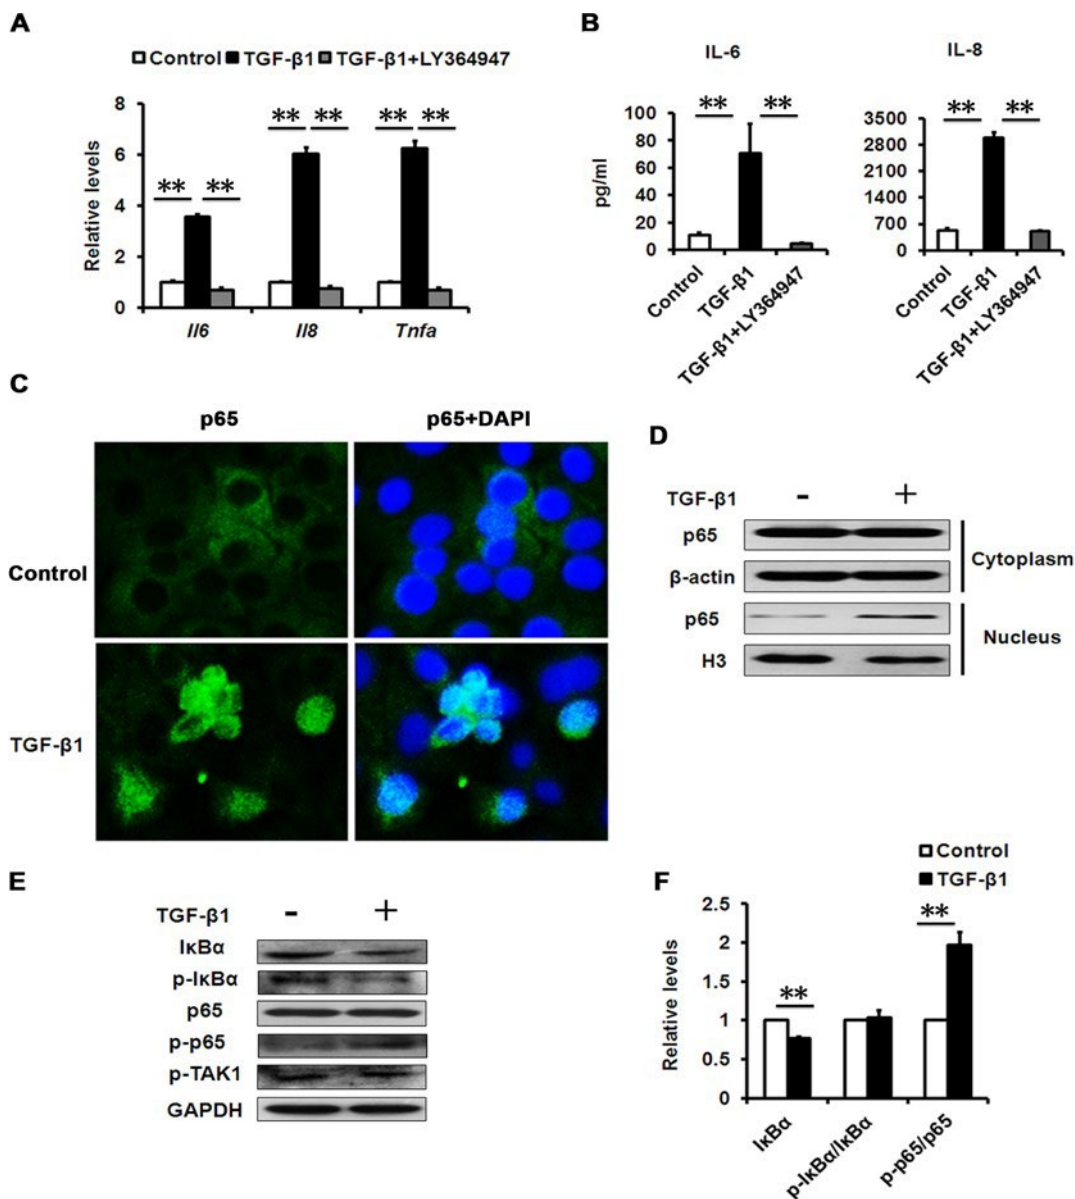

**Figure 4. Effects of TGF- $\beta$ 1 on SASP production.** (A) mRNA levels of the indicated genes in HCECs treated with TGF- $\beta$ 1 (10 ng/ml) for 3days. (B) The IL-6 and IL-8 in cultured HCECs supernatants were detected by ELISA. (C) HCECs were stimulated with TGF- $\beta$ 1 (10 ng/ml) for 24 h. NF- $\kappa$ B p65 translocation was detected by fluorescent microscope. (D) HCECs were treated with TGF- $\beta$ 1 (10 ng/ml) for 24 h. Cytoplasmic and nuclear levels of NF- $\kappa$ B p65 were analyzed by Western blot. (E) Western blots of whole cell extraction from HCECs treated with TGF- $\beta$ 1 (10 ng/ml) for 24h. (F) Quantification of western blots processed with Image J. \*\*P $\leq$ 0.01. Data are representative of three independent experiments.

mRNA by targeting AU-rich elements (AREs) in the 3' untranslated region while an ARE is conserved in *IκBα* mRNA across species [29, 32, 33]. Therefore, we further examined the degradation of *IκBα* mRNA in TGF-β-treated HCECs. We found that *IκBα* mRNA levels in HCECs were significantly lower following TGF-β treatment than in the untreated cells, while pharmacologic inhibition of TGF-β signaling could rescue the reduction of *IκBα* mRNA (Fig. 5E, F). When co-treated with TGF-β and transcriptional inhibitor actinomycin D (AcD), the decay of *IκBα* mRNA was

more potent than AcD treatment alone (Fig. 5G), demonstrating that TGF-β has a strong effect on *IκBα* mRNA decay. These findings suggest that TGF-β1 induced RNA SG formation and *IκBα* mRNA degradation, contributing to NF-κB activation in HCECs.

We also tested whether the human donor corneal epithelium displayed evidence of RNA stress and inflammation. The relative levels of RNA SG- and PG-associated genes in elderly donor corneal epithelium

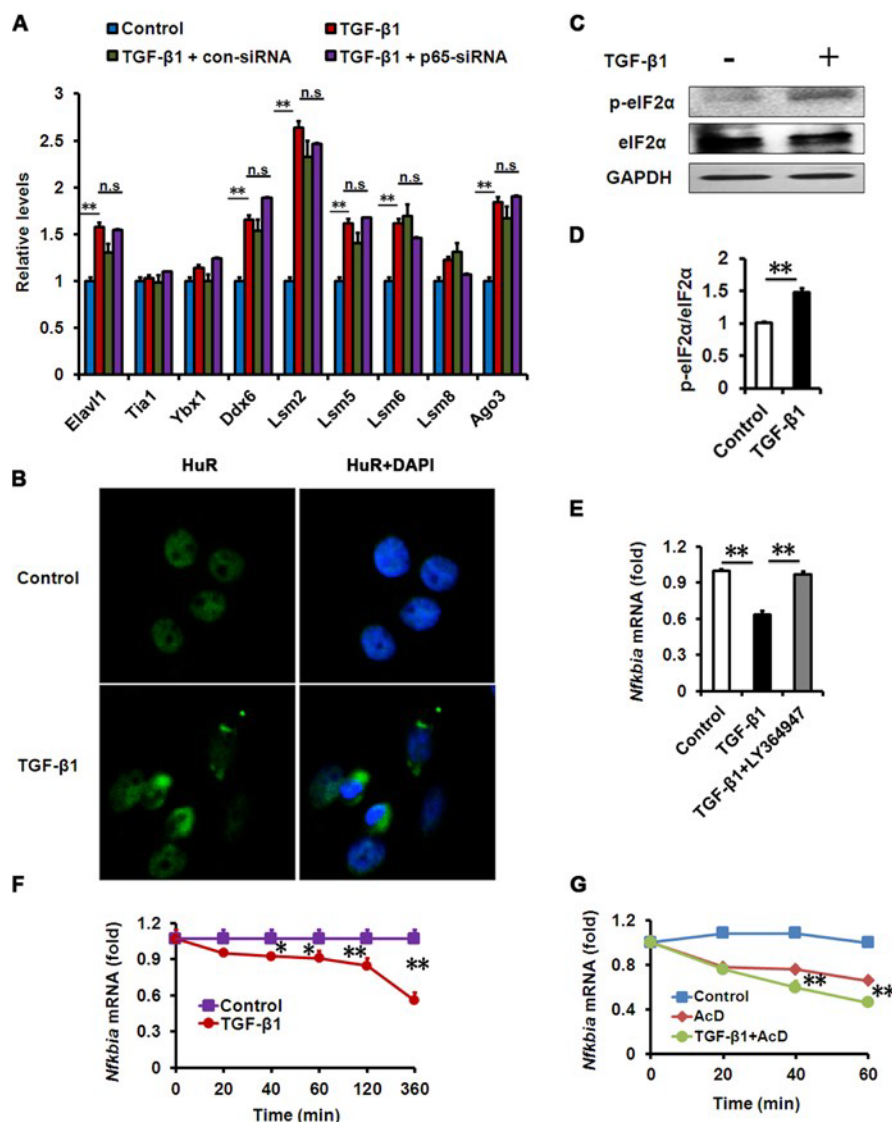

**Figure 5. Effects of TGF-β1 on HCECs RNA SGs and *IκBα* mRNA decay.** (A-B) mRNA levels of SG and PB components (A) or HuR immunostaining (B) in HCECs treated with TGF-β1 (10 ng/ml) for 24h alone, or in combination with indicated siRNA. Nuclear staining by DAPI revealed cells in sections. Images show representative HuR-containing aggregates. (C-D) Phosphorylation of eIF2α was detected by western blot after TGF-β1 (10 ng/ml) treatment for 24h. (E) mRNA levels of *IκBα* in HCECs treated with TGF-β1 (10 ng/ml) alone, or in combination with LY364947 (2 μM) for 24h. (F-G) *IκBα* mRNA levels in HCECs treated with TGF-β1 (10 ng/ml) (F) or actinomycin D (AcD) alone or AcD together with TGF-β1 (G) for the indicated durations. \*\*P ≤ 0.01, \*P ≤ 0.05.

were markedly increased compared to young donors (Fig. S1A). Immunofluorescence analysis showed that HuR-positive aggregates presented in elderly donor corneal epithelium, but only barely presented in younger ones (Fig. S1B). IL-8 and IL-6 mRNA abundance was also increased in elderly donor corneal epithelium (Fig. S1C), and immunofluorescence studies corroborated the increased levels of IL-8 in these epithelium (Fig. S1D). Collectively, these data provide evidence of increased RNA stress and aggravated inflammation *in situ* in elderly donor corneal epithelium, mirroring the data for HCECs treated with TGF- $\beta$  *in vitro*.

### NF- $\kappa$ B inhibition attenuates TGF- $\beta$ -induced senescence and senescence-associated inflammation

A growing amount of evidence indicates that chronic inflammation accelerates senescence, while

inflammation-deletion delays senescence [15, 28, 34]. However, whether NF- $\kappa$ B inhibition could alleviate TGF- $\beta$ -induced senescence and senescence-associated inflammation in HCECs remains unknown. Therefore, we assessed whether NF- $\kappa$ B inhibition using genetic tools could prevent senescence and senescence-associated inflammation induced by TGF- $\beta$ . We found that the percentage of SA- $\beta$ -gal-staining cells in HCECs was notably lower following co-treatment with TGF- $\beta$  and small interfering RNA specifically targeting p65 (p65-siRNA) versus TGF- $\beta$  treatment alone (Fig. 6A, B). Furthermore, western blot analysis showed that the expression of p16 and p21 was also significantly decreased in HCECs co-treatment with TGF- $\beta$  and p65 siRNA than TGF- $\beta$  treatment alone (Fig. 6C). And as expected, p65 siRNA markedly reduced the protein expression of p65. We also detected the levels of senescence-associated pro-inflammatory mediators, and found decreased IL-8 and IL-6 levels in HCECs co-

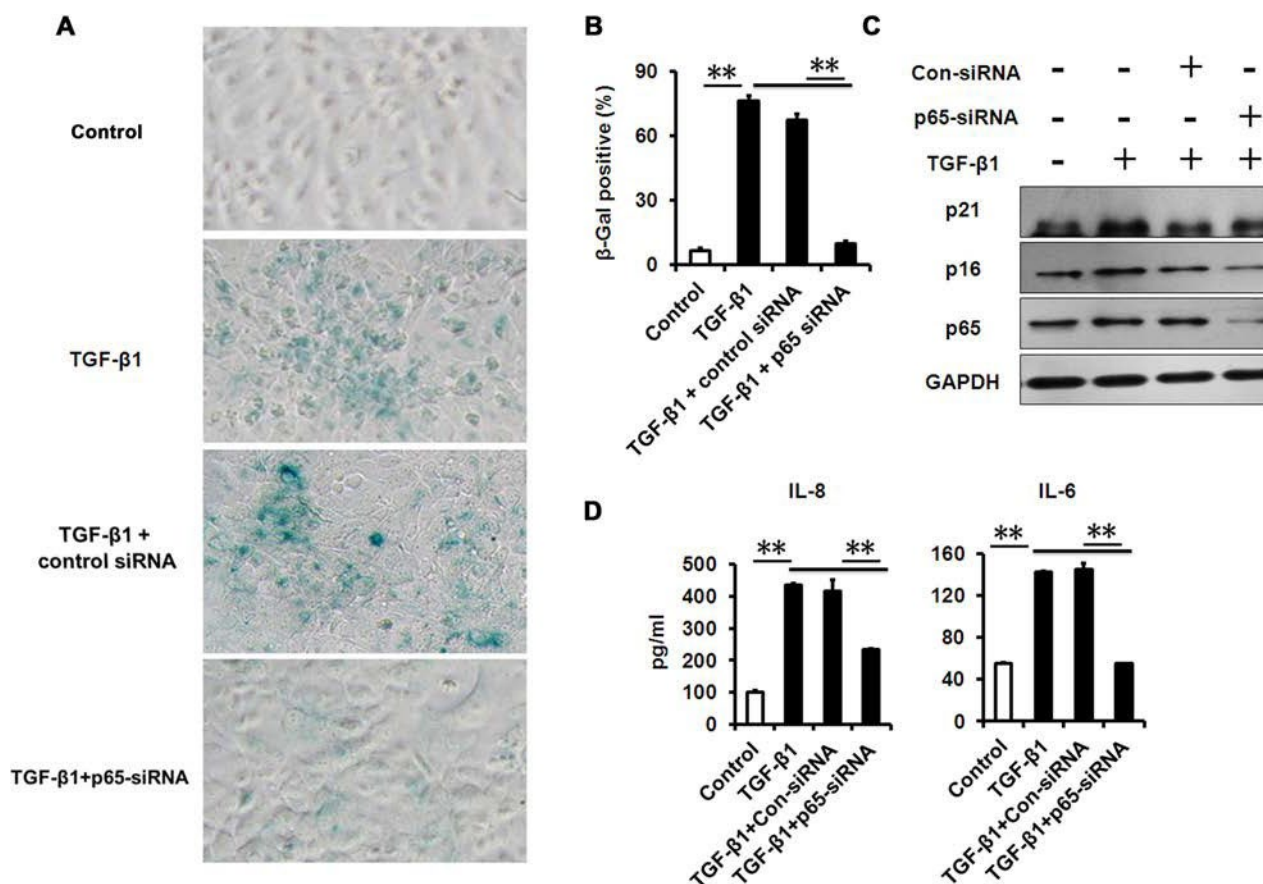

**Figure 6. NF- $\kappa$ B p65-knockdown attenuates TGF- $\beta$ 1 induced senescence and SASP. (A-B)** SA- $\beta$ -Gal activity and the percentage of SA- $\beta$ -gal-positive cells in HCECs treated with TGF- $\beta$ 1 for 3 days alone, or in combination with indicated siRNA. **(C)** Western blot analysis of p16 and p21 in HCECs treated with TGF- $\beta$ 1 for 3 days alone, or in combination with indicated siRNA. **(D)** The IL-6 and IL-8 in cultured HCECs supernatants were detected by ELISA. \*\* $P \leq 0.01$ . Data are representative of three independent experiments.



treated with TGF- $\beta$  and p65-siRNA than TGF- $\beta$  alone (Fig. 6D). Similar results were obtained using a chemical inhibitor JSH23, an inhibitor of NF- $\kappa$ B signaling (Fig. S2). In addition, we found p65-siRNA was unable to reverse TGF- $\beta$ -induced RNA SGs and PBs accumulation (Fig. 5A), indicating that NF- $\kappa$ B was not involved in activating the RNA stress response. Collectively, these results suggest that NF- $\kappa$ B signaling is implicated in TGF- $\beta$ -induced cellular senescence, and inflammation resolution can rescue HCECs from TGF- $\beta$ -induced senescence response.

## DISCUSSION

As experimental and clinical evidence has shown, the structure and function of the corneal epithelium are altered with aging. Age-related changes of the corneal epithelium are associated with major eye diseases, including the highly prevalent dry eye disease [6]. It is also known that TGF- $\beta$  signaling promotes the progression of senescence and stem cell quiescence [35-37]. However, the underlying mechanisms of corneal epithelial changes with aging are largely unknown. Here, we showed that TGF- $\beta$ 1 expression is increased in the elderly donor corneal epithelium, and this age-related expression of TGF- $\beta$ 1 is positively associated with aging of the corneal epithelium. We also found that excess TGF- $\beta$ 1 leads to cellular senescence and NF- $\kappa$ B activation in HCECs in a manner that is engaged in atypical mRNA decay of I $\kappa$ B $\alpha$ .

Our present findings are in line with the literature, showing that increased TGF- $\beta$  is not only seen in various corneal diseases but is also implicated in their pathogenesis [23, 38, 39]. Otherwise, we should realize that despite this relevance of TGF- $\beta$  to disease, it also has important biological functions in cell growth, differentiation, and transformation, and the complete deletion of TGF- $\beta$  is developmentally lethal [40]. With regard to the ocular surface epithelium, a lack of TGF- $\beta$  signaling can result in epithelial hyperplasia and goblet cell differentiation [41], and can also affect corneal wound-healing [42, 43], suggesting that a normal level of corneal TGF- $\beta$  is biologically required and thereby protective of the cornea. Therefore, we speculate that increased TGF- $\beta$  in many ocular diseases may represent an adaptive response. Although increased TGF- $\beta$  is observed in many ocular diseases, including pterygium, VKC, AKC, and graft-versus-host disease, and in DE conjunctivas, it is unclear how the increased TGF- $\beta$  affects epithelial cell functionality and contributes to the pathogenic process of such ocular surface diseases. Our results demonstrate that TGF- $\beta$  expression is increased in the elderly donor corneal epithelium and that excess TGF- $\beta$  leads to corneal epithelial senescence.

Therefore, appropriate TGF- $\beta$  suppression can present a therapeutic basis for treating aging or age-related ocular diseases. Nevertheless, further studies are necessary to determine whether TGF- $\beta$  itself or the downstream mechanism represents the most viable target for such treatments.

Senescent cells usually produce a series of cytokines, chemokines, and other soluble factors, a phenotype that is believed to reinforce senescence [12]. NF- $\kappa$ B has been implicated in inflammation in aging and age-related ocular disease. As shown in our study, NF- $\kappa$ B is also required in the senescence induced by TGF- $\beta$ 1. The senescence of HCECs induced by TGF- $\beta$ 1 was markedly attenuated while treated with NF- $\kappa$ B inhibitor JSH23 or p65-siRNA, and in accordance with previous reports, the SASP is dependent on NF- $\kappa$ B [44, 45]. Therefore, some of the SASP factors, such as IL-8, which is also highly expressed in elderly human corneal epithelium, probably contribute to the reinforcement of senescence.

Classical NF- $\kappa$ B activation depends on the I $\kappa$ B $\alpha$  phosphorylation and degradation induced by the activation of kinases, such as I $\kappa$ B $\alpha$  kinase and TAK1 [33]. As a result, activated NF- $\kappa$ B induces an array of gene expressions of inflammatory cytokines. Some researchers have found that TGF- $\beta$  can induce the production of inflammatory mediators in ocular surface epithelial cells [23]. However, the mechanisms behind this still remain unclear. Here, our results indicated that an RNA stress response induces I $\kappa$ B $\alpha$  mRNA degradation to activate NF- $\kappa$ B in HCECs. It has been reported that the RNA stress response can provide an early intracellular defense during which RNA SGs and PBs are formed to degrade AU-rich elements (AREs)-containing mRNAs [29, 32]. In this study, we demonstrated that I $\kappa$ B $\alpha$  mRNA turnover is fast and is sensitive to RNA granules-mediated mRNA decay in HCECs. Gene sequences analyses showed that AREs are conserved in I $\kappa$ B $\alpha$  mRNAs across species, and that TGF- $\beta$  can promote I $\kappa$ B $\alpha$  mRNA degradation in the hypothalamus of mice or in mouse hypothalamic GT1-7 cells, which further corroborated our conclusions [33]. Although excess TGF- $\beta$  can trigger the RNA stress response in HCECs, it remains to be studied whether other contributing factors exist, and how excess TGF- $\beta$  triggers this process. Furthermore, we found that the induction of NF- $\kappa$ B-triggered inflammatory genes was suppressed by TGF- $\beta$  signaling inhibition, suggesting that TGF- $\beta$  is involved in initiating inflammation in HCECs. These findings, coupled with our observation that the human elderly corneal epithelium contains elevated amounts of TGF- $\beta$ 1, IL-6, and IL-8, as well as evidence of increased RNA stress granules, provide a rationale for targeting this pathway in the corneal

epithelium. Nevertheless, it remains necessary to further elucidate the details of the associations between TGF- $\beta$ , NF- $\kappa$ B, and corneal epithelial senescence.

The present findings also reveal a new role for TGF- $\beta$  signaling in the ocular surface epithelium. TGF- $\beta$  signaling can be involved in cancer, and can serve as both a tumor suppressor and a tumor promoter. The limbal transition zone is highly susceptible to tumor formation in humans [46], but a link to TGF- $\beta$  signaling has not been established. The goblet cell expansion and conjunctival epithelial hyperplasia observed in *Tgfr2cKO* mice does not have the morphological features indicative of a malignant lesion, and maintains an intact basement membrane, indicating that the loss of TGF- $\beta$  signaling in the ocular surface epithelium is sufficient to promote epithelial hyperplasia but is insufficient for progression to carcinoma. This further suggests that additional insults are required to drive carcinogenesis in the ocular surface [41]. It has been reported that cellular senescence is crucial for tumor suppression and that the SASP reinforces senescence, activates immune surveillance to eliminate premalignant cells, and paradoxically also has pro-tumorigenic properties [47]. The findings in the present study showed that excess TGF- $\beta$ 1 in the ocular surface induces cellular senescence and senescence-associated inflammation, suggesting that cellular senescence induced by increased TGF- $\beta$  with aging or in age-related ocular disease may be important for anti-tumorigenesis, in addition to its roles in regulating proliferation and differentiation.

In summary, our study shows that excess TGF- $\beta$  in the aged corneal epithelium can induce cellular senescence and senescence-associated inflammation via an RNA stress response. Our findings enrich the understanding of how age-related diseases of the ocular surface occur with age, thereby providing potential therapeutic targets for age-related ocular diseases.

## MATERIALS AND METHODS

### Human cornea tissue

This study was approved by the Shandong Eye Institute Review Board. The handling of donor tissues was consistent to the tenets of the Declaration of Helsinki of 1975 and its 1983 revision in protecting donor confidentiality. The human donor corneas were provided by the International Federation of Eye Banks, Eye Bank of Shandong (Qingdao, China) and preserved in DX intermediate-term medium at 4 °C [48]. Most of the donors had causes that did not comprise corneal or eye disease. The death-to-preservation interval was less than 30 h. The donor corneal rims (residual tissues)

used for this study were collected via penetrating keratoplasty (PKP). The corneal rims were divided into several parts for immunofluorescence / immunohistochemistry staining or RNA analysis, respectively. Information of donors with different ages is listed in Table S1.

### Cell culture and treatment

Immortalized HCECs derived from human corneal epithelium were presented by professor Chonn-Ki Joo of the Catholic University of Korea, Seoul, Korea. HCECs were maintained in DMEM/F12 (Gibco, Grand Island, NY) with 10% FBS and penicillin-streptomycin at 37°C in a humidified atmosphere containing 5% CO<sub>2</sub>. Cells were fasted in serum-free medium for an overnight period and then the medium was replaced by fresh serum-free DF/12 supplemented with 10ng/ml recombinant human TGF- $\beta$ 1 (Peprotech) alone, or in combination with LY364947 (a potent inhibitor of TGF $\beta$ R, 2 $\mu$ M, Selleck ) or JSH-23 (an inhibitor of NF- $\kappa$ B transcriptional activity, 15 $\mu$ M, Selleck).

### siRNA treatment

HCECs which grew to 60-80% confluent in a 6-well plate for about 24 hours after seeding, were treated with both p65 siRNA and control siRNA (Santa Cruz), as previously reported [49]. Briefly, each siRNA treatments were gently mixed with each concentration with siRNA transfection medium and reagent solution at room temperature for 30 minutes, and then overlay the complex solution onto the washed HCECs. After 5-7 hours incubation, add fresh serum-free medium and incubate cells for an additional 18 hours. TGF- $\beta$ 1 treatment was carried out subsequently.

### Immunohistochemistry and Immunofluorescence staining

Immunohistochemical staining and immunofluorescence staining were performed as previously described [50]. For paraffin sections, the residual corneal rims from PKP were immersed in 4% paraformaldehyde (PFA) at 4°C until process. Corneal rims were processed and embedded in paraffin wax. Four-micrometer-thick corneal sections were deparaffinized and antigen was retrieved using a steamer in epitope retrieval solution (Maixin Biotech, Fujian, China). Anti-TGF- $\beta$ 1 (sc146, Santa Cruz), anti-p16 (ab51243, Abcam), anti-p21 (ab109520, Abcam), anti-IL-8 (sc73321, Santa Cruz) and anti-HuR (sc5261, Santa Cruz) were used as primary antibodies and subsequently reacted with secondary antibodies for immunohistochemistry or immunofluorescence staining. Naive IgGs of

appropriate species were used as negative controls. For pathological scoring, five fields per sample were examined and scored as described previously to facilitate comparisons [51].

For immunofluorescence staining of HCECs, HCECs grown on 24-well culture plates were fixed in 4% PFA for 15min, penetrated with 0.1% Triton-X 100 for 30min, blocked with 5%BSA for 1h at room temperature and treated with anti-HuR antibody (sc5261, Santa Cruz) or anti-p65 antibody (#4764, Cell Signaling) at 4°C overnight, and subsequently reacted with fluorescent secondary antibody (Abcam), respectively. DAPI staining was used to reveal all cells in the section. Images were taken using a confocal microscope.

### Flow Cytometric Analysis

Cell cycle status in the HCECs was determined by measuring nuclear DNA content. The cells were collected 48hours after treatment with TGF-β1, centrifuged at 300g for 5 minutes, and washed twice with ice-cold PBS. The cells then were fixed in 70% ethanol at 4°C for more than 4 hours. The pellet was collected by centrifugation before the RNase A solution was added (final concentration 10 mg/mL). After a 1-hour incubation at 37°C, the cells were stained with propidiumiodide (PI; final concentration 100 μg/mL) at 37°C for 30minutes. The samples were analyzed using a FACSCalibur flow cytometer (BD Bioscience).

### Quantitative RT-PCR

Total RNA was extracted from the cornea epithelium or cultured HCECs using TRIzol reagent (Invitrogen, Carlsbad, CA, USA) and was reverse-transcribed using reverse transcriptase (TOYOBO, Osaka, Japan). Quantitative real-time PCR analysis was performed on an ABI prism 7500 (Applied Biosystems, Foster City, CA, USA) using SYBR GREEN mix (TOYOBO, Osaka, Japan). Primers used for quantitative RT-PCR were listed in the Table S2.

### Western Blot

For whole cell extraction, the cornea epithelium from residual donor tissues or HCECs treated with TGF-β1 for the indicated time points were lysed in RIPA buffer (P0013B, Beyotime, Beijing, China) with protease inhibitor cocktail (Millipore). After centrifugation (4°C, 10 min, 12,000 g), samples were prepared for Western blot analysis.

For preparation of cytoplasmic and nuclear fraction, HCECs were treated with TGF-β1 for 24h. Nuclear and

cytoplasmic proteins of HCECs were extracted using the Nuclear and Cytoplasmic Protein Extraction Kit (P0028, Beyotime, Beijing, China) according to manufacturer's instructions.

Western blots were performed as described previously [52]. The membranes were probed with the following primary antibodies: anti-GAPDH (KC-5G5, Kangchen), anti-β-actin (LK9001, Sungene Biotech), anti-Histone H3 (ab1791, Abcam), anti-p16 (ab51243, Abcam), anti-p53 (ab26, Abcam), anti-p21 (ab109520, Abcam), anti-TGF-β1 (sc146, Santa Cruz), anti-IκBα (sc847, Santa Cruz), anti-p-IκBα (#2859, Cell Signaling), anti-p65 (#4764, Cell Signaling), anti-p-p65 (#3039, Cell Signaling), anti-p-TAK1 (#4531, Cell Signaling), anti-eIF2α(sc133132, Santa Cruz), anti-p-eIF2α (sc293100, Santa Cruz) and subsequently reacted with HRP-conjugated secondary antibodies, respectively (Pierce, 1:3,000). Quantification of western blots was processed with Image J.

### SA-β-Gal staining

HCECs were previously treated with TGF-β1 or indicated chemicals for 3 days. SA-β-gal activity was evaluated using the SA-β-gal Staining Kit (RG0039, Beyotime, Beijing, China) following the manufacturer's instructions.

### ELISA

Levels of IL-6 and IL-8 in cell culture supernatants were measured using commercially available enzyme-linked immunosorbent assay (ELISA) kits (Joyeebio, Shanghai, China).

### Statistical analyses

All experiments were performed at least three different experiments, and data was presented as mean±SD. Two-tailed Student's t-test was used for comparisons between two groups, and one-way analysis of variance (ANOVA) was used for comparisons among more than two groups. A value of  $p < 0.05$  was considered statistically significant.

### ACKNOWLEDGEMENTS

We sincerely thanked the other members in the Shandong Provincial Key Laboratory of Ophthalmology for their kind discussions and help.

### CONFLICTS OF INTEREST

None potential conflict of interest is disclosed.

## FUNDING

This work was supported by the Natural Science Foundation of Shandong Province (ZR2015PH008, BS2014YY003), National Natural Science Foundation of China (81530027, 81500767, 81370989).

## REFERENCES

1. Movahedan A, Afsharkhamseh N, Sagha HM, Shah JR, Milani BY, Milani FY, Logothetis HD, Chan CC, Djalilian AR. Loss of Notch1 disrupts the barrier repair in the corneal epithelium. *PLoS One*. 2013; 8:e69113. doi: 10.1371/journal.pone.0069113
2. Yang Y, Hong J, Deng SX, Xu J. Age-related changes in human corneal epithelial thickness measured with anterior segment optical coherence tomography. *Invest Ophthalmol Vis Sci*. 2014; 55:5032–38. doi: 10.1167/iovs.13-13831
3. Eckard A, Stave J, Guthoff RF. In vivo investigations of the corneal epithelium with the confocal Rostock Laser Scanning Microscope (RLSM). *Cornea*. 2006; 25:127–31. doi: 10.1097/01.icc.0000170694.90455.f7
4. Patel DV, Sherwin T, McGhee CN. Laser scanning in vivo confocal microscopy of the normal human corneoscleral limbus. *Invest Ophthalmol Vis Sci*. 2006; 47:2823–27. doi: 10.1167/iovs.05-1492
5. Rhim JH, Kim JH, Yeo EJ, Kim JC, Park SC. Caveolin-1 as a novel indicator of wound-healing capacity in aged human corneal epithelium. *Mol Med*. 2010; 16:527–34. doi: 10.2119/molmed.2010.00046
6. Gipson IK. Age-related changes and diseases of the ocular surface and cornea. *Invest Ophthalmol Vis Sci*. 2013; 54:ORSF48-53. doi: 10.1167/iovs.13-12840
7. Baker DJ, Wijshake T, Tchkonja T, LeBrasseur NK, Childs BG, van de Sluis B, Kirkland JL, van Deursen JM. Clearance of p16Ink4a-positive senescent cells delays ageing-associated disorders. *Nature*. 2011; 479:232–36. doi: 10.1038/nature10600
8. Guo H, Liu Z, Xu B, Hu H, Wei Z, Liu Q, Zhang X, Ding X, Wang Y, Zhao M, Gong Y, Shao C. Chemokine receptor CXCR2 is transactivated by p53 and induces p38-mediated cellular senescence in response to DNA damage. *Aging Cell*. 2013; 12:1110–21. doi: 10.1111/acer.12138
9. López-Otín C, Blasco MA, Partridge L, Serrano M, Kroemer G. The hallmarks of aging. *Cell*. 2013; 153:1194–217. doi: 10.1016/j.cell.2013.05.039
10. Acosta JC, Banito A, Wuestefeld T, Georgilis A, Janich P, Morton JP, Athineos D, Kang TW, Lasitschka F, Andrulis M, Pascual G, Morris KJ, Khan S, et al. A complex secretory program orchestrated by the inflammasome controls paracrine senescence. *Nat Cell Biol*. 2013; 15:978–90. doi: 10.1038/ncb2784
11. Kang TW, Yevsa T, Woller N, Hoenicke L, Wuestefeld T, Dauch D, Hohmeyer A, Gereke M, Rudalska R, Potapova A, Iken M, Vucur M, Weiss S, et al. Senescence surveillance of pre-malignant hepatocytes limits liver cancer development. *Nature*. 2011; 479:547–51. doi: 10.1038/nature10599
12. Kuilman T, Michaloglou C, Vredeveld LC, Douma S, van Doorn R, Desmet CJ, Aarden LA, Mooi WJ, Peeper DS. Oncogene-induced senescence relayed by an interleukin-dependent inflammatory network. *Cell*. 2008; 133:1019–31. doi: 10.1016/j.cell.2008.03.039
13. Burton DG, Faragher RG. Cellular senescence: from growth arrest to immunogenic conversion. *Age (Dordr)*. 2015; 37:27. doi: 10.1007/s11357-015-9764-2
14. d’Adda di Fagagna F. Living on a break: cellular senescence as a DNA-damage response. *Nat Rev Cancer*. 2008; 8:512–22. doi: 10.1038/nrc2440
15. Xu M, Tchkonja T, Ding H, Ogrodnik M, Lubbers ER, Pirtskhalava T, White TA, Johnson KO, Stout MB, Mezera V, Giorgadze N, Jensen MD, LeBrasseur NK, Kirkland JL. JAK inhibition alleviates the cellular senescence-associated secretory phenotype and frailty in old age. *Proc Natl Acad Sci USA*. 2015; 112:E6301–10. doi: 10.1073/pnas.1515386112
16. Rabin DM, Rabin RL, Blenkinsop TA, Temple S, Stern JH. Chronic oxidative stress upregulates Drusen-related protein expression in adult human RPE stem cell-derived RPE cells: a novel culture model for dry AMD. *Aging (Albany NY)*. 2013; 5:51–66. doi: 10.18632/aging.100516
17. Hubackova S, Krejčíková K, Bartek J, Hodny Z. IL1- and TGFβ-Nox4 signaling, oxidative stress and DNA damage response are shared features of replicative, oncogene-induced, and drug-induced paracrine ‘bystander senescence’. *Aging (Albany NY)*. 2012; 4:932–51. doi: 10.18632/aging.100520
18. Imai R, Asai K, Hanai J, Takenaka M. Transgenic mice overexpressing glia maturation factor-β, an oxidative stress inducible gene, show premature aging due to Zmpste24 down-regulation. *Aging (Albany NY)*. 2015; 7:486–99. doi: 10.18632/aging.100779



19. Lin HK, Bergmann S, Pandolfi PP. Cytoplasmic PML function in TGF-beta signalling. *Nature*. 2004; 431:205–11. doi: 10.1038/nature02783
20. Senturk S, Mumcuoglu M, Gursoy-Yuzugullu O, Cingoz B, Akcali KC, Ozturk M. Transforming growth factor-beta induces senescence in hepatocellular carcinoma cells and inhibits tumor growth. *Hepatology*. 2010; 52:966–74. doi: 10.1002/hep.23769
21. Yousef H, Conboy MJ, Morgenthaler A, Schlesinger C, Bugaj L, Paliwal P, Greer C, Conboy IM, Schaffer D. Systemic attenuation of the TGF- $\beta$  pathway by a single drug simultaneously rejuvenates hippocampal neurogenesis and myogenesis in the same old mammal. *Oncotarget*. 2015; 6:11959–78. doi: 10.18632/oncotarget.3851
22. Minagawa S, Araya J, Numata T, Nojiri S, Hara H, Yumino Y, Kawaishi M, Odaka M, Morikawa T, Nishimura SL, Nakayama K, Kuwano K. Accelerated epithelial cell senescence in IPF and the inhibitory role of SIRT6 in TGF- $\beta$ -induced senescence of human bronchial epithelial cells. *Am J Physiol Lung Cell Mol Physiol*. 2011; 300:L391–401. doi: 10.1152/ajplung.00097.2010
23. Benito MJ, Calder V, Corrales RM, García-Vázquez C, Narayanan S, Herreras JM, Stern ME, Calonge M, Enríquez-de-Salamanca A. Effect of TGF- $\beta$  on ocular surface epithelial cells. *Exp Eye Res*. 2013; 107:88–100. doi: 10.1016/j.exer.2012.11.017
24. Campisi J, d’Adda di Fagagna F. Cellular senescence: when bad things happen to good cells. *Nat Rev Mol Cell Biol*. 2007; 8:729–40. doi: 10.1038/nrm2233
25. Liu F, Wu S, Ren H, Gu J. Klotho suppresses RIG-I-mediated senescence-associated inflammation. *Nat Cell Biol*. 2011; 13:254–62. doi: 10.1038/ncb2167
26. Acosta JC, O’Loughlen A, Banito A, Guijarro MV, Augert A, Raguz S, Fumagalli M, Da Costa M, Brown C, Popov N, Takatsu Y, Melamed J, d’Adda di Fagagna F, et al. Chemokine signaling via the CXCR2 receptor reinforces senescence. *Cell*. 2008; 133:1006–18. doi: 10.1016/j.cell.2008.03.038
27. Wan YY, Flavell RA. ‘Yin-Yang’ functions of transforming growth factor-beta and T regulatory cells in immune regulation. *Immunol Rev*. 2007; 220:199–213. doi: 10.1111/j.1600-065X.2007.00565.x
28. Zhao J, Li X, McGowan S, Niedernhofer LJ, Robbins PD. NF- $\kappa$ B activation with aging: characterization and therapeutic inhibition. *Methods Mol Biol*. 2015; 1280:543–57. doi: 10.1007/978-1-4939-2422-6\_32
29. Decker CJ, Parker R. P-bodies and stress granules: possible roles in the control of translation and mRNA degradation. *Cold Spring Harb Perspect Biol*. 2012; 4:a012286. doi: 10.1101/cshperspect.a012286
30. Thomas MG, Loschi M, Desbats MA, Boccaccio GL. RNA granules: the good, the bad and the ugly. *Cell Signal*. 2011; 23:324–34. doi: 10.1016/j.cellsig.2010.08.011
31. Vilas-Boas Fde A, da Silva AM, de Sousa LP, Lima Km, Vago JP, Bittenourt LF, Dantas AE, Gomes DA, Vilela MC, Teixeira MM, Barcelos LS. Impairment of stress granule assembly via inhibition of the eIF2 alpha phosphorylation sensitizes glioma cells to chemotherapeutic agents. *J Neurooncol*. 2016; 127:253–60. doi: 10.1007/s11060-015-2043-3
32. Buchan JR, Parker R. Eukaryotic stress granules: the ins and outs of translation. *Mol Cell*. 2009; 36:932–41. doi: 10.1016/j.molcel.2009.11.020
33. Yan J, Zhang H, Yin Y, Li J, Tang Y, Purkayastha S, Li L, Cai D. Obesity- and aging-induced excess of central transforming growth factor- $\beta$  potentiates diabetic development via an RNA stress response. *Nat Med*. 2014; 20:1001–08. doi: 10.1038/nm.3616
34. Laberge RM, Sun Y, Orjalo AV, Patil CK, Freund A, Zhou L, Curran SC, Davalos AR, Wilson-Edell KA, Liu S, Limbad C, Demaria M, Li P, et al. MTOR regulates the pro-tumorigenic senescence-associated secretory phenotype by promoting IL1A translation. *Nat Cell Biol*. 2015; 17:1049–61. doi: 10.1038/ncb3195
35. Kandasamy M, Lehner B, Kraus S, Sander PR, Marschallinger J, Rivera FJ, Trümbach D, Ueberham U, Reitsamer HA, Strauss O, Bogdahn U, Couillard-Despres S, Aigner L. TGF-beta signalling in the adult neurogenic niche promotes stem cell quiescence as well as generation of new neurons. *J Cell Mol Med*. 2014; 18:1444–59. doi: 10.1111/jcmm.12298
36. Wu J, Niu J, Li X, Wang X, Guo Z, Zhang F. TGF- $\beta$ 1 induces senescence of bone marrow mesenchymal stem cells via increase of mitochondrial ROS production. *BMC Dev Biol*. 2014; 14:21. doi: 10.1186/1471-213X-14-21
37. Zhao M, Perry JM, Marshall H, Venkatraman A, Qian P, He XC, Ahamed J, Li L. Megakaryocytes maintain homeostatic quiescence and promote post-injury regeneration of hematopoietic stem cells. *Nat Med*. 2014; 20:1321–26. doi: 10.1038/nm.3706
38. Foster J, Wu WH, Scott SG, Bassi M, Mohan D, Daoud Y, Stark WJ, Jun AS, Chakravarti S. Transforming growth factor  $\beta$  and insulin signal changes in stromal fibroblasts of individual keratoconus patients. *PLoS One*. 2014; 9:e106556.

doi: 10.1371/journal.pone.0106556

39. Saeed-Rad S, Raoofian R, Mahbod M, Mirafteb M, Mojarrad M, Asgari S, Rezvan F, Hashemi H. Analysis of superoxide dismutase 1, dual-specificity phosphatase 1, and transforming growth factor, beta 1 genes expression in keratoconic and non-keratoconic corneas. *Mol Vis.* 2013; 19:2501–07.
40. Böttinger EP, Letterio JJ, Roberts AB. Biology of TGF-beta in knockout and transgenic mouse models. *Kidney Int.* 1997; 51:1355–60. doi: 10.1038/ki.1997.185
41. McCauley HA, Liu CY, Attia AC, Wikenheiser-Brookamp KA, Zhang Y, Whitsett JA, Guasch G. TGFβ signaling inhibits goblet cell differentiation via SPDEF in conjunctival epithelium. *Development.* 2014; 141:4628–39. doi: 10.1242/dev.117804
42. Bettahi I, Sun H, Gao N, Wang F, Mi X, Chen W, Liu Z, Yu FS. Genome-wide transcriptional analysis of differentially expressed genes in diabetic, healing corneal epithelial cells: hyperglycemia-suppressed TGFβ3 expression contributes to the delay of epithelial wound healing in diabetic corneas. *Diabetes.* 2014; 63:715–27. doi: 10.2337/db13-1260
43. Ljubimov AV, Saghizadeh M. Progress in corneal wound healing. *Prog Retin Eye Res.* 2015; 49:17–45. doi: 10.1016/j.preteyeres.2015.07.002
44. Chien Y, Scuoppo C, Wang X, Fang X, Balgley B, Bolden JE, Premrsirut P, Luo W, Chicas A, Lee CS, Kogan SC, Lowe SW. Control of the senescence-associated secretory phenotype by NF-κB promotes senescence and enhances chemosensitivity. *Genes Dev.* 2011; 25:2125–36. doi: 10.1101/gad.17276711
45. Freund A, Patil CK, Campisi J. p38MAPK is a novel DNA damage response-independent regulator of the senescence-associated secretory phenotype. *EMBO J.* 2011; 30:1536–48. doi: 10.1038/emboj.2011.69
46. Lavker RM, Tseng SC, Sun TT. Corneal epithelial stem cells at the limbus: looking at some old problems from a new angle. *Exp Eye Res.* 2004; 78:433–46. doi: 10.1016/j.exer.2003.09.008
47. Ohtani N, Takahashi A, Mann DJ, Hara E. Cellular senescence: a double-edged sword in the fight against cancer. *Exp Dermatol.* 2012 (Suppl 1); 21:1–4. doi: 10.1111/j.1600-0625.2012.01493.x
48. Song Z, Wang Y, Xie L, Zang X, Yin H. Expression of senescence-related genes in human corneal endothelial cells. *Mol Vis.* 2008; 14:161–70.
49. Takase O, Minto AW, Puri TS, Cunningham PN, Jacob A, Hayashi M, Quigg RJ. Inhibition of NF-kappaB-dependent Bcl-xL expression by clusterin promotes albumin-induced tubular cell apoptosis. *Kidney Int.* 2008; 73:567–77. doi: 10.1038/sj.ki.5002563
50. Cambier S, Mu DZ, O'Connell D, Boylen K, Travis W, Liu WH, Broaddus VC, Nishimura SL. A role for the integrin alphavbeta8 in the negative regulation of epithelial cell growth. *Cancer Res.* 2000; 60:7084–93.
51. Friedrichs K, Gluba S, Eidtmann H, Jonat W. Overexpression of p53 and prognosis in breast cancer. *Cancer.* 1993; 72:3641–47. doi: 10.1002/1097-0142(19931215)72:12<3641::AID-CNCR2820721215>3.0.CO;2-8
52. Araya J, Cambier S, Morris A, Finkbeiner W, Nishimura SL. Integrin-mediated transforming growth factor-β activation regulates homeostasis of the pulmonary epithelial-mesenchymal trophic unit. *Am J Pathol.* 2006; 169:405–15. doi: 10.2353/ajpath.2006.060049

## SUPPLEMENTARY MATERIAL

**Supplemental Table S1. Donor information**

| Groups              | Donor age (Y) |
|---------------------|---------------|
| age $\leq$ 30y      | 8             |
|                     | 21            |
|                     | 25            |
| 30y $<$ age $<$ 50y | 26            |
|                     | 28            |
|                     | 38            |
| age $\geq$ 50y      | 42            |
|                     | 45            |
|                     | 48            |
|                     | 52            |
|                     | 54            |
|                     | 55            |
|                     | 59            |
|                     | 59            |
|                     | 60            |
|                     | 60            |
| 62                  |               |
| 65                  |               |
| 65                  |               |

**Supplemental Table S2. Primers used for real time-PCR**

| Gene name             | Orientation | Primer sequence (5' - 3')   |
|-----------------------|-------------|-----------------------------|
| GAPDH                 | forward     | AGGGCTGCTTTTAACTCTGGT       |
|                       | reverse     | CCCCTTGTATTTGGAGGGA         |
| P16                   | forward     | CACGGGTCGGGTGAGAGT          |
|                       | reverse     | CCCAACGCACCGAATAGTTAC       |
| P21                   | forward     | GCCTGGACTGTTTCTCTCG         |
|                       | reverse     | ATTCAGCATTGTGGGAGGAG        |
| P53                   | forward     | TTGAGACTGGGTCTCGCTTT        |
|                       | reverse     | AAATGCAGATGTGCTTGCAG        |
| TGF- $\beta$ 1        | forward     | CCCAGCATCTGCAAAGCTC         |
|                       | reverse     | GTCAATGTACAGCTGCCGCA        |
| IL-6                  | forward     | GATGAGTACAAAAGTCCTGATCCA    |
|                       | reverse     | CTGCAGCCACTGGTTCTGT         |
| IL-8                  | forward     | ACCGGAAGGAACCATCTCACT       |
|                       | reverse     | GGAAGGCTGCCAAGAGAGC         |
| TNF- $\alpha$         | forward     | CAGCCTCTTCTCCTTCCTGAT       |
|                       | reverse     | GCCAGAGGGCTGATTAGAGA        |
| Elav1                 | forward     | GAGGCTCCAGTCAAAAACCA        |
|                       | reverse     | GTTGGCGTCTTTGATCACCT        |
| Tia1                  | forward     | GGGATATGGCTTTGTCTCCTT       |
|                       | reverse     | GCCACCACCCATCTGTTGAATG      |
| Ddx6                  | forward     | GAAATGGCTTATGCCGCAAT        |
|                       | reverse     | GATGACCAAAGCGACCTGATC       |
| Ybx1                  | forward     | AGATGGAGAGACTGTGGAGTTTGA    |
|                       | reverse     | GGACCCCTACGACGTGGATA        |
| Lsm2                  | forward     | AGCATCTGTGGAACCCCTCCAT      |
|                       | reverse     | TGGCAGCTGCACGTATCG          |
| Lsm5                  | forward     | TGTTGGTACTCTTCTAGGATTTGATGA |
|                       | reverse     | CCTCCAGGAACCAGCATTGTTA      |
| Lsm6                  | forward     | CGGACGACCAGTTGTGGTAA        |
|                       | reverse     | CGGATAAATGCATCCCCATACT      |
| Lsm8                  | forward     | CGTCCGCTTTGGAGAACTACA       |
|                       | reverse     | CCCCCTGTGAAGAGCTGAATAC      |
| Ago3                  | forward     | TGGGAGCCGATGTCACTCA         |
|                       | reverse     | AGGCCAAGTCCTGGATGATCT       |
| I $\kappa$ B $\alpha$ | forward     | GATCCGCCAGGTGAAGGG          |
|                       | reverse     | GCAATTTCTGGCTGGTTGG         |



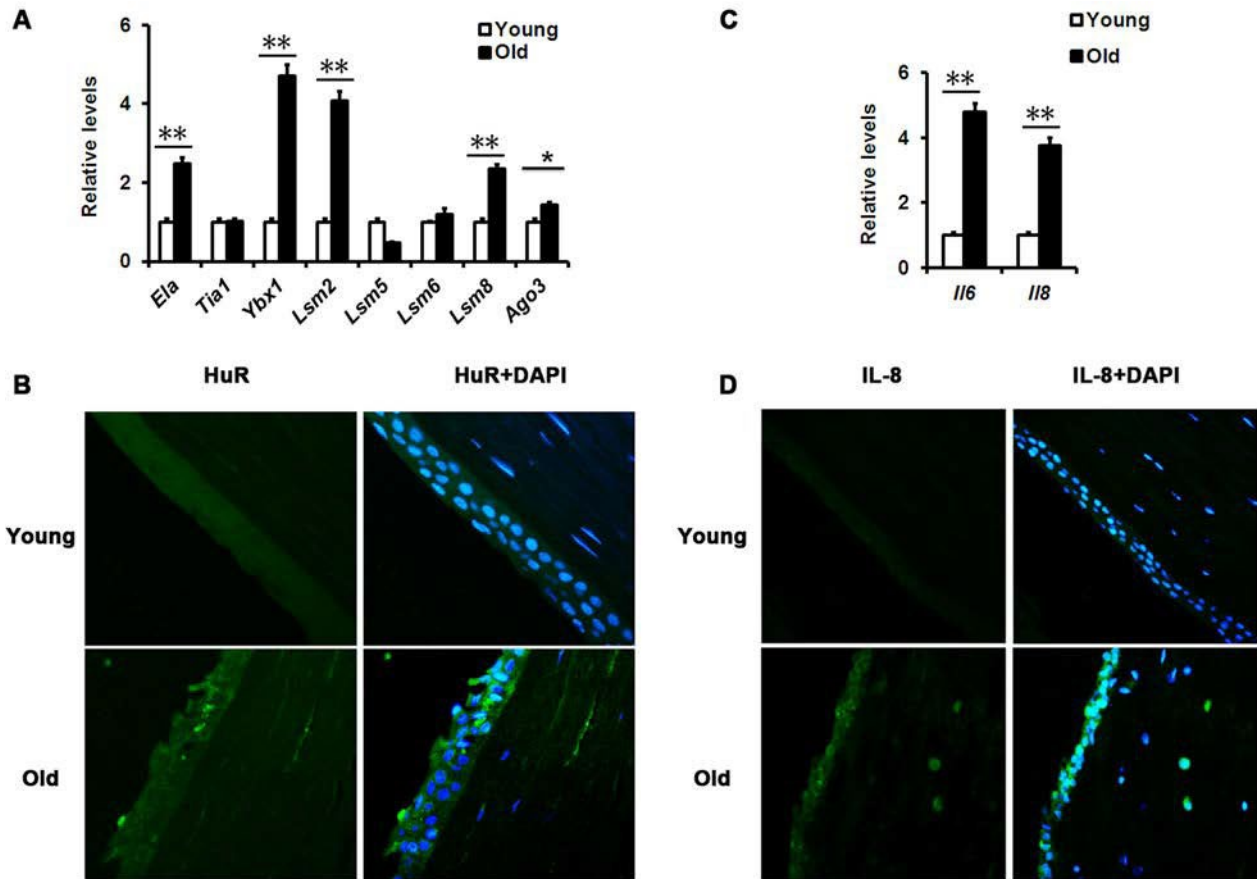

**Supplemental Figure S1. RNA stress and SASP in aged human corneal epithelium.** (A-B) mRNA levels of SG and PB components (A) or HuR immunostaining (B) in young donor and old donor corneal epithelium. (C) mRNA levels of the indicated SASP genes in young donor and old donor corneal epithelium. (D) IL-8 staining in donor corneal epithelium.

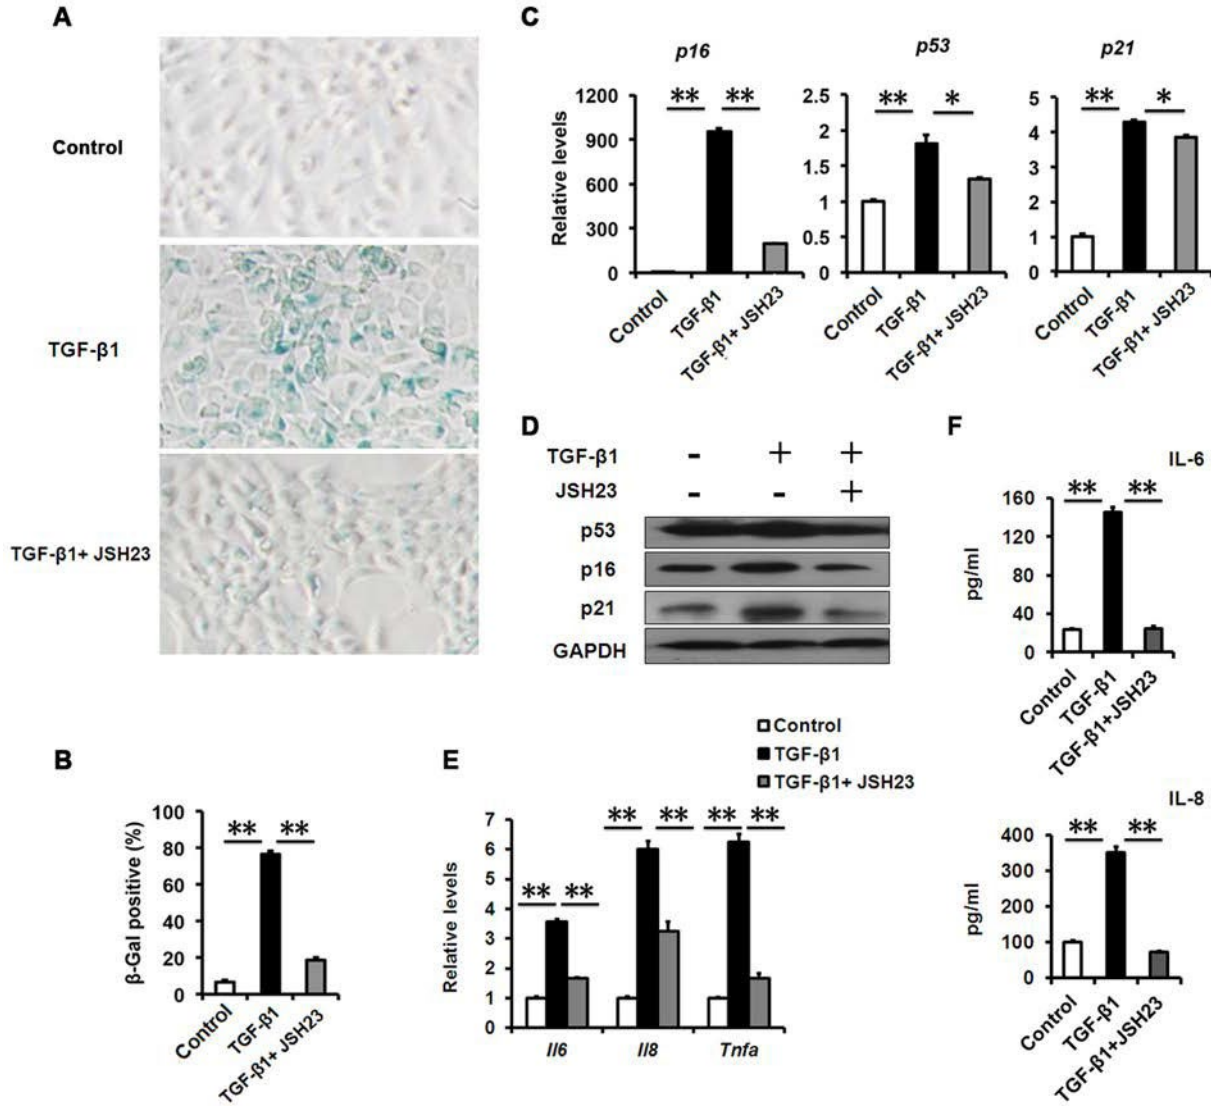

**Supplemental figure S2. NF-κB inhibition with JSH23 attenuates TGF-β1 induced senescence and SASP.** (A-B) SA-β-Gal activity and the percentage of SA-β-gal-positive cells in HCECs treated with TGF-β1 alone, or in combination with JSH-23 (15μM). (C-D) The mRNA and protein levels of p16, p53 and p21 in HCECs treated with TGF-β1 alone, or in combination with JSH-23 (15μM). (E) mRNA levels of the indicated SASP genes in HCECs treated with TGF-β1 (10 ng/ml) for 3 days. (F) The IL-6 and IL-8 in cultured HCECs supernatants were detected by ELISA.
